# Supplementary material for: Computational Studies on Sirtuins from Trypanosoma cruzi: Structures, Conformations and Interactions with Phytochemicals
Source: PubMed Central journal article supplement (PMC3923677; doi:10.1371/journal.pntd.0002689), 2014-02-13

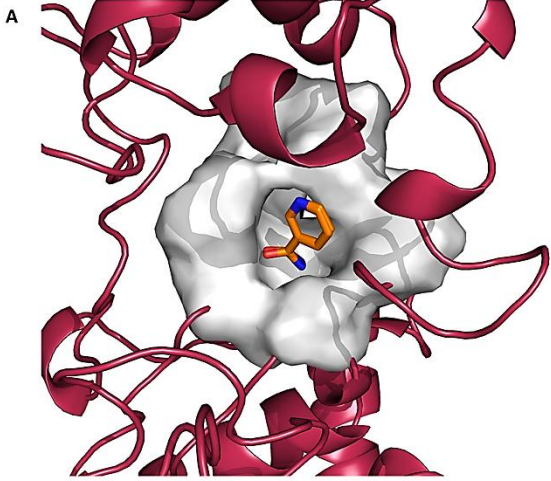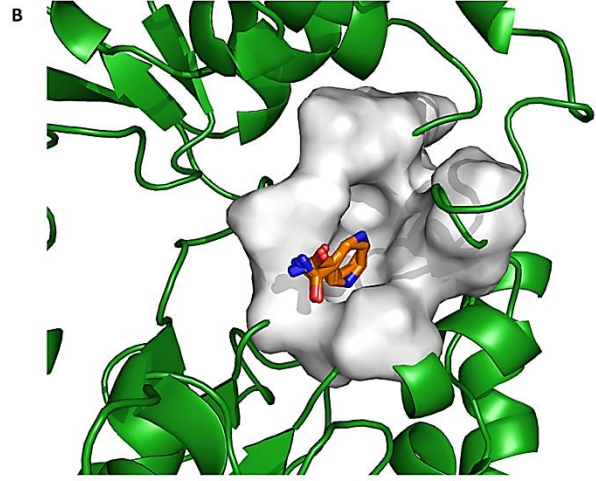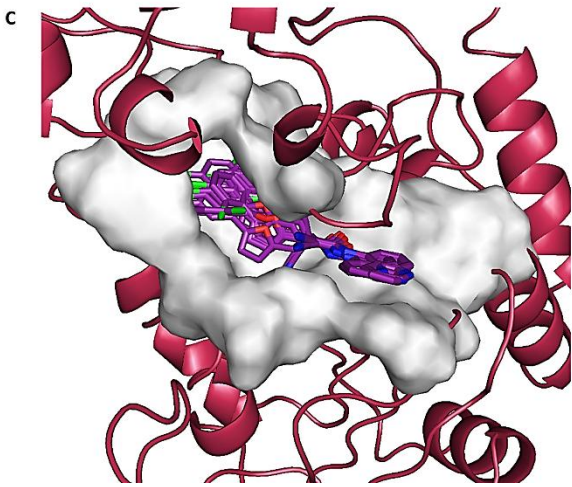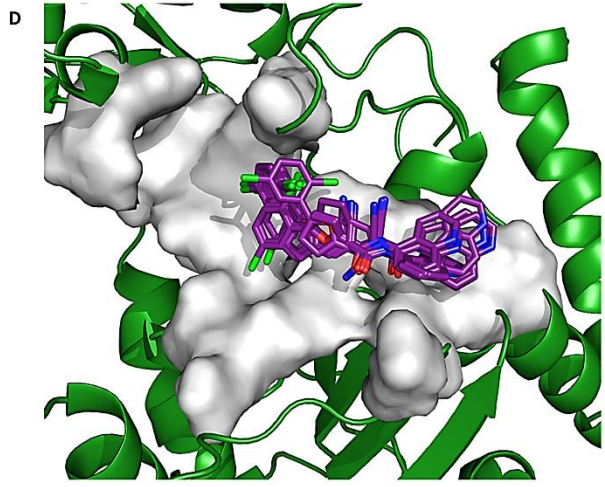

Supplement: pntd.0002689.s004.pdf [file pntd.0002689.s004.pdf]
