# Supplementary material for: Computational Studies on Sirtuins from Trypanosoma cruzi: Structures, Conformations and Interactions with Phytochemicals
Source: PubMed Central journal article supplement (PMC3923677; doi:10.1371/journal.pntd.0002689), 2014-02-13
Supplement: pntd.0002689.s009.pdf [file pntd.0002689.s009.pdf]

| N° | Chemical names                                            | Smile Codes                                                                                                                                                     |
|----|-----------------------------------------------------------|-----------------------------------------------------------------------------------------------------------------------------------------------------------------|
| 1  | Acetoxidyhydroxyheptandecene                              | <chem>C=CC(C#CC#CC(O)CCCCCCCCCOC(C)=O)OC(C)=O</chem>                                                                                                            |
| 2  | AcetylDglucopyranosyldideroside                           | <chem>O=C(OC)C1=CO[C@@H](OC2C(O)C(O)C(COC(C)=O)O2)[C@@H]([C@@H](OC(C)=O)C)[C@@H]1C(O)=O</chem>                                                                  |
| 3  | Ambigol A                                                 | <chem>C1C=CC(CI)=C(OC2=CC=C(CI)C=C2CI)C(O)=C1C3=CC(CI)=CC(CI)=C3O</chem>                                                                                        |
| 4  | Ambigol C                                                 | <chem>C1C1=C(O)C(CI)=C(OC2=CC=C(CI)C=C2CI)C=C1OC3=CC(CI)=CC(CI)=C3</chem>                                                                                       |
| 5  | Anacardicacid (8E, 11E)                                   | <chem>O=C(O)C1=C(CCCCCC/C=C/C/C=C/CCC)C=CC=C1O</chem>                                                                                                           |
| 6  | Ancistectorine A2                                         | <chem>C[C@H]1C2=C(O)C=C(OC)C=C2C(C3=CC=C(OC)C4=C3C=CC=C4OC)[C@H](C)N1</chem>                                                                                    |
| 7  | Ancistrogriffine C                                        | <chem>COC1=C(C2=CC=C(O)C3=C2C=C(C)C=C3OC)C(O)=C([C@H](C)N([H])[C@@H](C)C4)C4=C1</chem>                                                                          |
| 8  | Ancistrogriffithine A                                     | <chem>OC1=C(C2=CC(C3=CC(C4=C(OC)C([C@@H](C)N[C@@H](C)C5)=C5C=C4O)=C(C=C(C)C)=C6OC)C6=C3O)=C(O)C7=C2C=C(C)C=C7OC)C(OC)=C([C@@H](C)N([H])[C@@H](C)C8)C8=C1</chem> |
| 9  | Angoroside C                                              | <chem>OC1=CC=C(/C=C/C/O[C@@H]2[C@@H](CO[C@H]3[C@H](O)[C@@H](O)[C@@H](O)CO3)O[C@@H](OCCC4=CC(O)=C(OC)C=C4)[C@H](O)</chem>                                        |
| 10 | Caaverine                                                 | <chem>[H][C@@]1(N([H])CC2)CC3=CC=CC=C3C4=C1C2=CC(OC)=C4O</chem>                                                                                                 |
| 11 | Caffeicacid                                               | <chem>OC1=C(O)C=C(/C=C/C(O)=O)C=C1</chem>                                                                                                                       |
| 12 | Chaetoxanthone A                                          | <chem>COC1=C2C(OC(C=C(O[C@]3(C)O[C@H]4C[C@@H](O)C3)C4=C5O)=C5C2=O)=CC=C1</chem>                                                                                 |
| 13 | Chaetoxanthone B                                          | <chem>COC1=C2C(OC(C=C(O[C@]3(C)O[C@H]4CCC3)C4=C5O)=C5C2=O)=CC=C1</chem>                                                                                         |
| 14 | Chaetoxanthone C                                          | <chem>OC(C([C@]1([H])O[C@H](C)CCC1)=C2O)=CC3=C2C(C4=C(OC)C=CC=C4O3)=O</chem>                                                                                    |
| 15 | Cissampelofavone                                          | <chem>O=C1C=C(C2=CC=C(O)C(OC)=C2)OC3=C1C=C(C(C4=C(O)C=C(OC)C=C4OC)=O)=C(C5=CC=C(OC)C=C5)O6)C6=C3</chem>                                                         |
| 16 | Deacetylgedunin                                           | <chem>O=C1[C@@H]2[C@]3(O2)[C@]4(C)[C@H](O)CC5[C@](C)(C)C(C=C[C@]5(C)C4CC[C@@]3(C)[C@H](C6=COC=C6)O1)=O</chem>                                                   |
| 17 | DemethylpraecansonA                                       | <chem>OC1=C(C=CC(C)(C)O2)C2=CC(OC)=C1C(/C([H])=C(O)/C3=CC=CC=C3)=O</chem>                                                                                       |
| 18 | 2.2-dimethyl-6-carboxyethenyl-2H-1-benzopyrane            | <chem>OC(/C=C/C1=CC=C(OC(C)(C)C=C2)C2=C1)=O</chem>                                                                                                              |
| 19 | 2.2-dimethyl-6-carboxyethenyl-8-prenyl2H-1-benzopyrane    | <chem>OC(/C=C/C1=CC(C/C=C(C)/C)=C(OC(C)(C)C=C2)C2=C1)=O</chem>                                                                                                  |
| 20 | Dimethylmethoxybenzochromenylmetanol                      | <chem>COC1=CC2=C(C=C1)OC(C)(C)C3=CC=C(CO)C=C32</chem>                                                                                                           |
| 21 | Entkaurenoicacid                                          | <chem>C[C@]12C(CC[C@]3(CC4=C)C2CC[C@@H]4C3)[C@@](CC(O)=O)(C)CCC1</chem>                                                                                         |
| 22 | EntnaringeninylOmethylnaringeninyl                        | <chem>OC1=CC(O)=C(C([C@@H](C2=C3C(C(C[C@@H](C4=CC=C(OC)C=C4)O3)=O)=C(O)C=C2O)[C@H](C5=CC=C(O)C=C5)O6)=O)C6=C1</chem>                                            |
| 23 | Gallocatechindigallate                                    | <chem>OC(C(OC(C1=CC(O)=C(O)C(O)=C1)=O)=C2)=C(O)C=C2C3C(OC(C4=CC(O)=C(O)C(O)=C4)=O)C(C5=C(O)C=C(O)C=C5O3)=O</chem>                                               |
| 24 | Gamafagarine                                              | <chem>COC1=C2C(OC=C2)=NC3=C(OC)C=CC=C31</chem>                                                                                                                  |
| 25 | Garciaxanthone B                                          | <chem>C=CC(C)(C)C1=C(O)C2=C(C(O)=C1)OC3=C4C(C=CC(C)(C)O4)=CC=C3C2=O</chem>                                                                                      |
| 26 | Geranylgeraniol                                           | <chem>C/C(C)=C/CC/C(C)=C/CC/C(C)=C/CC/C(C)=C/O</chem>                                                                                                           |
| 27 | Gravicin A                                                | <chem>O=C1C2=CC=CC(O)=C2OC3=C1C(O)=CC(/C=C/[C@@]4(C)[C@](C5=CC(O)=C(C(C(C)=CC=C6O)=C6O7)=O)C7=C5O)([H])C=C(C)CC4)=C3O</chem>                                    |
| 28 | Haemanthamine                                             | <chem>[H][C@@]12N3CC4=CC(OCO5)=C5C=C4[C@@]1([C@@H](O)C3)C=CC(OC)C2</chem>                                                                                       |
| 29 | Helenalin                                                 | <chem>O=C1C=C[C@]2([H])[C@]1(C)[C@@H](O)[C@H](C(C(O3)=O)=C)[C@H]3C[C@H]2C</chem>                                                                                |
| 30 | hydroxyanthecotulide                                      | <chem>C/C(C)=C\C(C/C(C)=C/[C@H](O)[C@@H]1COC(C1=C)=O)=O</chem>                                                                                                  |
| 31 | Hydroxydaidzein                                           | <chem>OC1=C2C(C(C3=CC=C(O)C(O)=C3)=CO2)=O)=CC=C1</chem>                                                                                                         |
| 32 | Hydroxymethylbutendimethoxytetrahydrofuroquinoliylacetate | <chem>COC1=C2C(OC=C2)=NC3=C1CCC(OC(C)=O)[C@]3(/C=C/C(C)(O)C)OC</chem>                                                                                           |
| 33 | Ioxadispiroketalaculeatin D                               | <chem>O[C@H](C1)C[C@@H](CCCCCCCCCCCC)O[C@]21CC[C@]3(C=CC(C=C3)=O)O2</chem>                                                                                      |
| 34 | Ivalin                                                    | <chem>O[C@H]1CC([C@@][C[C@H](C(C(O2)=O)=C)[C@H]2C3)([H])[C@]3(C)C1)=C</chem>                                                                                    |
| 35 | Komorovinone                                              | <chem>C[C@@]1(C)CCC[C@@]2(O3)C1C[C@@]3(O)C(C(C(C)C)=C(OC)C4=O)=O)=C4C2</chem>                                                                                   |
| 36 | Luteolin                                                  | <chem>O=C1C=C(C2=CC=C(O)C(O)=C2)OC3=C1C(O)=CC(O)=C3</chem>                                                                                                      |
| 37 | Machilin G                                                | <chem>C[C@H]1[C@@H](C)[C@H](C2=CC=C(OC)C(OC)=C2)O[C@@H]1C3=CC(OCO4)=C4C=C3</chem>                                                                               |
| 38 | Methylpluviatolide                                        | <chem>O=C1OC[C@H](CC2=CC=C3C(OCO3)=C2)[C@H]1CC4=CC(OC)=C(O)C=C4</chem>                                                                                          |
| 39 | OdimethylancistrocladiniumA                               | <chem>COC1=CC(OC)=C(C(C)=[N+](C2=C(C=C(C)C=C3O)C3=C(OC)C=C2)[C@@H](C)C4)C4=C1</chem>                                                                            |

|    |                                  |                                                                                                                             |
|----|----------------------------------|-----------------------------------------------------------------------------------------------------------------------------|
| 40 | Parthenolide                     | <chem>C/C1=C\CC[C@]2(C)[C@@H](O2)[C@@H](OC(C3=C)=O)[C@H]3CC1</chem>                                                         |
| 41 | Phenylanthraquinonesknipholone   | <chem>O=C1C2=C(C(C3=C(O)C(C(C)=O)=C(OC)C=C3O)=C(C)C=C2O)C(C4=CC=CC(O)=C41)=O</chem>                                         |
| 42 | Piperine                         | <chem>O=C(N1CCCCC1)/C=C/C=C/C2=CC(OCO3)=C3C=C2</chem>                                                                       |
| 43 | 3-Prenyl-4-hydroxycinnamicacid   | <chem>OC(/C=C/C1=CC=C(O)C(C/C=C(C)/C)=C1)=O</chem>                                                                          |
| 44 | 3.5-Prenyl-4-hydroxycinnamicacid | <chem>OC(/C=C/C1=CC(C/C=C(C)/C)=C(O)C(C/C=C(C)/C)=C1)=O</chem>                                                              |
| 45 | Sarachine                        | <chem>C[C@@H](C1([H])CC[C@H](C)CN1[H])[C@@]2([H])CCC3C4CC=C5C[C@@H](N)CC[C@]5(C)C4CC[C@@]32C</chem>                         |
| 46 | Sophoraflavone G                 | <chem>OC1=CC(O)=C(C[C@@H](C2=C(O)C=C(O)C=C2)O3)=O)C3=C1CC(C(C)=C)C/C=C(C)\C</chem>                                          |
| 47 | Tiliroside                       | <chem>O=C1C(O[C@@H]2O[C@H](CCC(/C=C/C3=CC=C(O)C=C3)=O)[C@@H](O)[C@H](O)[C@H]2O)=C(C4=CC=C(O)C=C4)OC5=C1C(O)=CC(O)=C5</chem> |
| 48 | Usnicacid R                      | <chem>O=C1C(C(C)=O)C([C@]2(C)C3=C(O)C(C)=C(O)C(C(C)=O)=C3OC2=C1)=O</chem>                                                   |
| 49 | Usnicacid S                      | <chem>OC1=C(C)C(O)=C2C(OC(C2(C)C3=O)=CC(C3C(C)=O)=O)=C1C(C)=O</chem>                                                        |
| 50 | Vismione D                       | <chem>C\C(C)=C/CC/C(C)=C/COC(C=C1O)=CC(C1=C2O)=CC3=C2C(CC(O)(C)C3)=O</chem>                                                 |
