# Supplementary material for: Computational Studies on Sirtuins from Trypanosoma cruzi: Structures, Conformations and Interactions with Phytochemicals
Source: PubMed Central journal article supplement (PMC3923677; doi:10.1371/journal.pntd.0002689), 2014-02-13
Supplement: pntd.0002689.s010.pdf [file pntd.0002689.s010.pdf]

|                 | <b>TcSir2rp1</b>                                     | <b>hSIRT2</b>                                       |
|-----------------|------------------------------------------------------|-----------------------------------------------------|
| <b>Pocket A</b> | A38, G39, V42, A 43, G213, N238,<br>L239, D307, C308 | A85, G86, T89, S90, G261, N286,<br>K287, E323, C324 |
| <b>Pocket B</b> | F49, R50, I 56, P68, Q122, H142,<br>V218             | F96, R97, L103, P115, Q167, H187,<br>V266           |
| <b>Pocket C</b> | S41, H104, T121, N123, I124, D125                    | S88, H149, T166, N168,<br>I169, D170                |
