# Supplementary material for: Computational Studies on Sirtuins from Trypanosoma cruzi: Structures, Conformations and Interactions with Phytochemicals
Source: PubMed Central journal article supplement (PMC3923677; doi:10.1371/journal.pntd.0002689), 2014-02-13
Supplement: pntd.0002689.s011.pdf [file pntd.0002689.s011.pdf]

|                        | <b>TcSir2rp1<br/>non-productive<br/>conformation</b> | <b>Tcsir2rp1<br/>productive<br/>conformation</b> |
|------------------------|------------------------------------------------------|--------------------------------------------------|
| <b>NAD<sup>+</sup></b> | 51.6                                                 | 94.3                                             |
| <b>Nicotinamide</b>    | 28.3                                                 | 34.6                                             |
| <b>AGK2</b>            | 58.3                                                 | 71.2                                             |
