# Supplementary material for: Computational Studies on Sirtuins from Trypanosoma cruzi: Structures, Conformations and Interactions with Phytochemicals
Source: PubMed Central journal article supplement (PMC3923677; doi:10.1371/journal.pntd.0002689), 2014-02-13
Supplement: pntd.0002689.s012.pdf [file pntd.0002689.s012.pdf]

|            | Non-productive TcSIR2rp1 |              |      | Productive TcSIR2rp1 |              |      |
|------------|--------------------------|--------------|------|----------------------|--------------|------|
|            | NAD                      | Nicotinamide | AGK2 | NAD                  | Nicotinamide | AGK2 |
| Cluster 1  | 24                       | 99           | 16   | 46                   | 100          | 28   |
| Cluster 2  | 1                        | 1            | 5    | 1                    |              | 3    |
| Cluster 3  | 1                        |              | 15   | 17                   |              | 5    |
| Cluster 4  | 6                        |              | 45   | 2                    |              | 7    |
| Cluster 5  | 12                       |              | 14   | 3                    |              | 17   |
| Cluster 6  | 1                        |              | 5    | 1                    |              | 27   |
| Cluster 7  | 3                        |              |      | 2                    |              | 10   |
| Cluster 8  | 7                        |              |      | 5                    |              | 1    |
| Cluster 9  | 1                        |              |      | 4                    |              | 4    |
| Cluster 10 | 4                        |              |      | 2                    |              |      |
| Cluster 11 | 6                        |              |      | 2                    |              |      |
| Cluster 12 | 5                        |              |      | 1                    |              |      |
| Cluster 13 | 1                        |              |      | 2                    |              |      |
| Cluster 14 | 2                        |              |      | 1                    |              |      |
| Cluster 15 | 12                       |              |      | 1                    |              |      |
| Cluster 16 | 1                        |              |      | 1                    |              |      |
| Cluster 17 | 2                        |              |      | 2                    |              |      |
| Cluster 18 | 1                        |              |      | 3                    |              |      |
| Cluster 19 | 1                        |              |      | 3                    |              |      |
| Cluster 20 | 1                        |              |      | 1                    |              |      |
| Cluster 21 | 3                        |              |      |                      |              |      |
| Cluster 22 | 1                        |              |      |                      |              |      |
| Cluster 23 | 1                        |              |      |                      |              |      |
| Cluster 24 | 3                        |              |      |                      |              |      |
